# Supplementary material
Source: PubMed Central journal article supplement (PMC2644650)
Supplement: ddn336_1.pdf [file ddn336_1.pdf]

**Supplementary Figure 1.** RT-PCR analysis of *csw* expression in developing larvae.

*Rp49* gene expression was used as control. Similar levels of *csw* expression were induced in wild type and Noonan syndrome-transgene expressing larvae by GAL4. Total RNA from *tub-GAL4/+* larvae was used as a negative control.

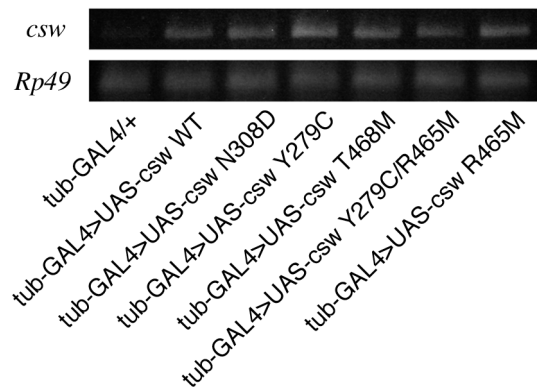

**Supplementary Figure 2.** MAPK activation in ubiquitous LEOPARD and Noonan syndrome-transgene expressing larvae. The expression of dpERK is not increased in the phosphatase-dead mutant transgenic larvae, comparable to the wild type larvae showing a minimal level of dpERK.

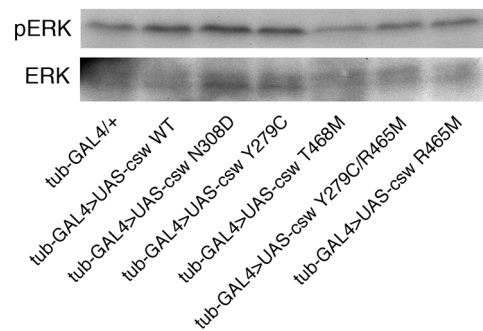

## Supplementary Table

### Relative copy number of *csw* transcript with transgene expression using *tub-GAL4*

| <i>csw</i> mutation                                           | Relative copy number $\pm$ S.D. | P value vs <i>UAS-csw</i> <sup>WT</sup> |
|---------------------------------------------------------------|---------------------------------|-----------------------------------------|
| <i>tub-GAL4/+</i>                                             | ND                              |                                         |
| <i>tub-GAL4&gt; UAS-csw</i> <sup>WT</sup>                     | 12.14 $\pm$ 1.90                |                                         |
| <i>tub-GAL4&gt; UAS-csw</i> <sup>N308D</sup>                  | 14.39 $\pm$ 1.52                | 0.321                                   |
| <i>tub-GAL4&gt; UAS-csw</i> <sup>Y279C</sup>                  | 14.75 $\pm$ 2.82                | 0.344                                   |
| <i>tub-GAL4&gt; UAS-csw</i> <sup>T468M</sup>                  | 39.25 $\pm$ 5.81                | 0.025                                   |
| <i>tub-GAL4&gt; UAS-</i><br><i>csw</i> <sup>Y279C/R465M</sup> | 20.01 $\pm$ 6.22                | 0.196                                   |
| <i>tub-GAL4&gt; UAS-csw</i> <sup>R465M</sup>                  | 9.00 $\pm$ 0.53                 | 0.062                                   |
